1 **Hydrophobic organic contaminants are not linked to microplastic uptake in**

2 **Baltic Sea herring**

3 \*Ogonowski M.<sup>1,2</sup>, Wenman V.<sup>1</sup>, Barth A.<sup>3</sup>, Hamacher-Barth E.<sup>3</sup>, Danielsson S.<sup>4</sup> and \*Gorokhova  
4 E.<sup>1</sup>

5  
6 <sup>1</sup> Stockholm University, Department of Environmental Science and Analytical Chemistry, Svante  
7 Arrhenius väg 8, SE-106 91, Stockholm, Sweden

8 <sup>2</sup> Swedish University of Agricultural Sciences, Department of Aquatic Resources, Institute of  
9 Freshwater Research, Stångholmsvägen 2, SE-178 93, Drottningholm, Sweden

10 <sup>3</sup> Stockholm University, Department of Biochemistry and Biophysics, Svante Arrhenius väg 16C,  
11 SE-106 91, Stockholm, Sweden

12 <sup>4</sup> Swedish Museum of Natural History, Department of Environmental Science and Monitoring, P.  
13 O. Box 50 007, SE-104 05, Stockholm Sweden

14

15 \*corresponding authors:

16 [martin.ogonowski@aces.su.se](mailto:martin.ogonowski@aces.su.se)

17 [elena.gorokhova@aces.su.se](mailto:elena.gorokhova@aces.su.se)

18

19 **Declarations of interest: none**

20

21 **Abstract**

22 It is commonly accepted that microplastic (MP) ingestion can lead to lower food intake and  
23 bioaccumulation of hydrophobic organic contaminants (HOCs) in aquatic organisms. However,  
24 causal links between MP and contaminant levels in biota are poorly understood and *in situ* data  
25 are very limited. Here, we investigated whether HOC concentrations in herring muscle tissue  
26 (*Clupea harengus membras*) are related to MP ingestion using fish caught along the West coast  
27 of the Baltic Sea. The MP occurrence exhibited a large geographic variability, with MP found in  
28 22.3% of the fish examined. The population average was 1.0 MP ind<sup>-1</sup>; however, when only  
29 individuals containing MP were considered, the average MP burden was 4.4 MP ind<sup>-1</sup>. We also  
30 found that MP burden decreased with reproductive stage of the fish but increased with its body  
31 size. To predict MP abundance in fish guts, we constructed a mass-balance model using literature  
32 data on MP in the water column and physiological rates on ingestion and gut evacuation for  
33 clupeids of a similar size. The model output was in agreement with the observed values, thus  
34 supporting the validity of the results. Contaminant concentrations in the muscle tissue were  
35 unrelated to the MP levels in fish, suggesting a lack of direct links between the levels of HOCs  
36 and MP ingestion. Thus, despite their ubiquity, MP are unlikely to have a measurable impact on  
37 food intake or the total body burden of hydrophobic contaminants in Baltic herring.

38

39 **Keywords:** *Microplastic, Baltic Sea, herring, hydrophobic organic contaminants, marine monitoring*

40

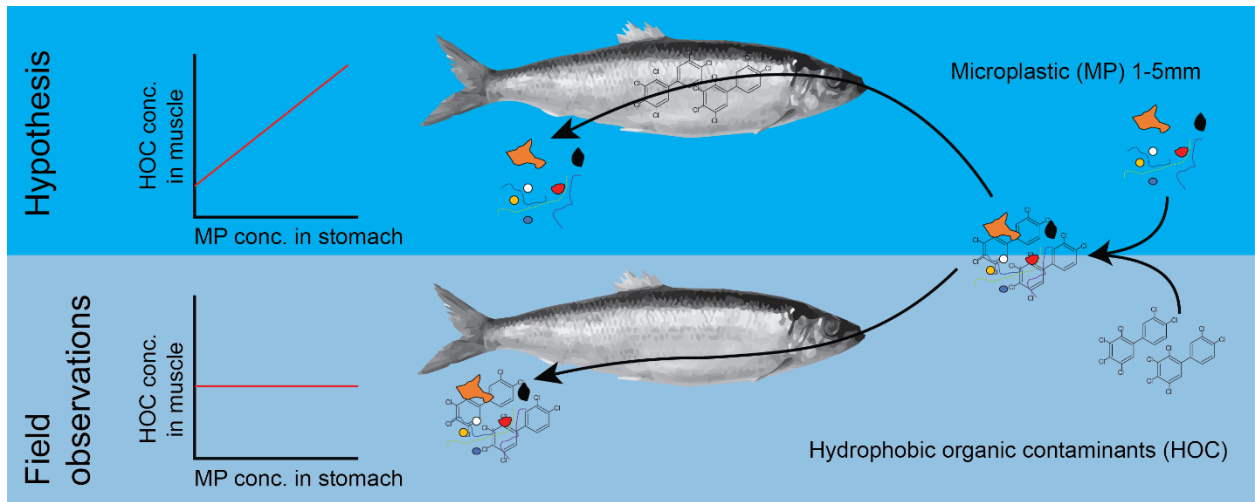

41

42

43 **Introduction**

44 Plastic debris, including microplastics (MP < 5 mm), can be ingested by aquatic animals across  
45 several trophic levels (Lusher et al. 2013, 2015, Cole et al. 2013). Due to the importance of  
46 commercial fish and shellfish species for human consumption, the ingestion and presence of MP  
47 in these animals has become a matter of concern (EFSA Panel on Contaminants in the Food Chain  
48 (CONTAM) 2016). To address this concern and to provide a quantitative assessment of MP  
49 ingestion in various fish species, an active research is ongoing (Lusher et al. 2013, Foekema et al.  
50 2013, Rummel et al. 2016, Budimir et al. 2018, Beer et al. 2018).

51  
52 A commonly held paradigm states that MP ingestion can lead to decreased nutritional status  
53 (Cole et al. 2015, Ogonowski et al. 2016) and bioaccumulation of hydrophobic organic chemicals  
54 (HOCs) (Oliveira et al. 2012, Besseling et al. 2013, Rochman et al. 2013, Wardrop et al. 2016) that  
55 sorb to the MP particles in the water and desorb in the gut lumen (Mato et al. 2001, Rusina et al.  
56 2010, Rochman et al. 2014). However, some experimental and modeling studies indicate that  
57 plastic polymers could also have a net cleaning effect acting as passive samplers while in the  
58 digestive system and thereby relieve the animals of HOCs (Gouin et al. 2011, Herzke et al. 2016,  
59 Koelmans et al. 2016, Mohamed Nor and Koelmans 2019). The relative importance of  
60 microplastics as vectors for contaminant transport remains unresolved, possibly also due to the  
61 lack of field data linking HOC concentrations in biota to ingested MP.

62  
63 Here, we studied MP ingestion by Baltic Sea herring (*Clupea harengus membras* L.), a  
64 commercially exploited fish and a keystone species in the Baltic food web. Being facultative

65 pelagic filter-feeders (Huse and Toresen 1996), herring stand a high risk of ingesting MP along  
66 with zooplankton prey and hence accumulating MP-associated contaminants. It is also a sentinel  
67 species in the Swedish National Monitoring Program for Contaminants in Marine Biota and, thus,  
68 a potential indicator species for MP monitoring in the Baltic Sea (Beer et al. 2018).

69  
70 If MP ingestion indeed contributes significantly to HOC bioaccumulation in contaminated  
71 environments, then one would see a positive correlation between the amount of MP ingested  
72 over time and HOC concentrations in the herring tissues. However, there are no reliable methods  
73 to estimate accumulated MP exposure using field samples, because MP do not accumulate to  
74 any significant extent in the fish digestive system (Lusher et al. 2013, Jovanović 2017). Although  
75 gut contents reflect only a recent ingestion history (Ahlbeck et al. 2012), the MP burden  
76 determined by gut content analysis is commonly used as a reflection of the feeding habits and  
77 habitats of the fish. Another area of concern with respect to the interpretation of MP counts in  
78 environmental samples, including fish guts, is analytical accuracy and reliability of MP extraction  
79 and determination (Dehaut et al. 2016). Therefore, to increase the reliability of the MP gut  
80 content data, it is important to verify whether the recorded MP body burden is within ecologically  
81 plausible rates of ingestion and gut evacuation. To compare the observed MP abundance in the  
82 fish gut with the intake that can be expected given the MP abundance in the water column, and  
83 gut evacuation that can be expected given the food intake, a mass-balance modelling approach  
84 can be used. We applied such modeling in this study using literature-derived parameters on  
85 clupeid feeding and food processing as well as ambient MP concentrations, to estimate MP  
86 burden in the herring with a body size similar to those in our collection. We also evaluated  
87 whether HOC concentrations in the fish muscle were related to the weight-specific MP gut  
88 content of the same individual.

89

## 90 **Materials and Methods**

### 91 *Fish collection and sample characteristics*

92 The Baltic herring used for our analyses were collected by the Swedish National Monitoring  
93 Program for Contaminants in Marine Biota conducted by the Swedish Museum of Natural History  
94 (Stockholm, Sweden). To avoid possible bias by known point sources, we randomly selected 130  
95 specimens that had been collected at thirteen reference monitoring stations (Figure 1), thus  
96 covering a sufficiently large geographical area that would provide a representative range of HOC  
97 and MP exposure for the analysis.

98

99 The sex ratio of the selected fish was approximately 50:50 and uniform across sampling sites. The  
100 individuals were 3-7 years old, with a total length of  $173 \pm 18$  mm and body weight  $35 \pm 12$  g  
101 (mean  $\pm$  SD). The reproductive phase determined by gametocytic maturity was classified on a  
102 five-degree scale according to Bucholtz et al. (2008) and included deformed gonads (stage 1),  
103 post spawned individuals (stage 2), juveniles (stage 3), individuals with developing gonads (stage  
104 4) and fish with mature gonads (stage 5). Each fish was dissected, and the muscle tissues taken  
105 from the middle dorsal muscle layer were used for HOC analysis, whereas the entire  
106 gastrointestinal tract (GIT) was used for the MP analysis. All sampling was performed according  
107 to standard procedures (TemaNord 1995). After dissecting, each individual GIT was packed in  
108 aluminum foil to avoid cross-contamination. All GIT samples were immediately frozen at  $-20$  °C  
109 and stored until MP analysis at the Department of Environmental Science and Analytical  
110 Chemistry, Stockholm University, Sweden.

111

112 *MP quantification in the gastrointestinal tract of fish*

113 Each GIT was placed in a glass Petri dish, opened with surgical scissors, and rinsed with deionized,  
114 particle-free water. Using a stereo microscope, the bolus was examined, and any items  
115 resembling MP were extracted by stainless steel pincers and transferred to clean Eppendorf  
116 tubes. The appearance of the putative MP was recorded and each particle was categorized  
117 according to its shape (fiber or fragment) and color. Hereafter, the number of MP per individual  
118 fish is referred to as *MP burden*.

119

120 To relate HOC concentration in the muscle tissue and MP intake by fish, the fish size must be  
121 taken into account when expressing MP counts. Moreover, in our collection, the bolus size varied  
122 considerably among the individual fish and geographical areas (Supporting Information Table S  
123 2), indicating variability in feeding activity shortly before sampling and/or gut evacuation that  
124 might have been related to stress during the sampling. To account for this variability and the  
125 corresponding variation in the observed MP burden, we normalized the individual MP counts to  
126 its gut fullness; the latter was assessed by visual observation on a five-step semi-quantitative  
127 scale: 0 (empty gut, no food items), 0.25, 0.5 0.75 or 1 (full gut). The obtained values were further  
128 normalized to the individual body weight and termed *weight-specific MP burden* [number of MP  
129 / (gut fullness × body weight) (g wet weight)]. This allowed for relating HOC concentrations in the  
130 fish to the expected MP burden in the GIT on a weight basis.

131 The following polymer identification scheme was applied. First, to identify whether the putative  
132 MP were synthetic polymers, we followed the recommendations of Norén (2007) and Hidalgo-

133 Ruz et al. (2012). Particles 1-5 mm in diameter were recorded and classified as MP, if all the  
134 following criteria were met: (i) uniform, unnaturally bright or of an unnatural color, (ii) lack of  
135 organic structures, and (iii) uniform diameter over the entire length of a fiber. Second, to test the  
136 accuracy of the visual identification, a random subset of 16 samples containing putative MP (i.e.,  
137 the gut contents of 16 individual fish, containing in total 26 microparticles) was analyzed using  
138 Fourier transform infrared spectroscopy (FTIR). Third, MP-validation was performed by  
139 comparing the sample spectra to a published reference database (Primpke et al. 2018). The Hit  
140 Quality Index (HQI) was used to determine whether a sample spectrum matched any spectra in  
141 the database. The HQI-threshold for a match was set at 70% similarity (Thompson et al. 2004). A  
142 detailed description of the data preparation of sample spectra is provided in Supporting  
143 Information 1.1.

144

#### 145 *FTIR analysis*

146 The infrared spectra were recorded at  $4\text{ cm}^{-1}$  resolution with a Bruker Vertex 70 FTIR instrument  
147 that was equipped with a Bruker Platinum attenuated reflection (ATR) unit. Data were recorded  
148 on both sides of the center burst of the interferogram during forward and backward movement  
149 of the interferometer mirror. A zero filling factor of 2 was used and the spectra were apodized  
150 with a Blackman-Harris 3-term function. The spectra for samples 1 – 6 (Supporting Information  
151 Table S 1) were recorded using a HgCdTe detector, 100 sample scans were recorded and the  
152 scanning time was 22 sec. The spectra for samples 7 – 26 (Supporting Information Table S 1) were  
153 recorded using a DTGS detector, 364 sample scans were recorded within 300 s scanning time.  
154 Individual particles were placed on the diamond crystal of the ATR unit and pressed onto the  
155 crystal with a piston. Prior to each measurement the crystal was cleaned with 99% ethanol.



156

157 *Controls and blanks*

158 To prevent contamination by airborne particles during the examination, the dissections were  
159 performed under a Fumex local extractor (Wesch et al. 2016); each sample being analyzed for 10  
160 min. A Petri dish filled with filtered deionized water was placed next to a test sample to serve as  
161 a blank for the quantification and characterization of potential contamination during the analysis.  
162 When working with samples, a cotton lab coat and gloves were used: moreover, the type and  
163 color of clothing were recorded to enable contamination back-tracing. All procedural blanks  
164 contained particles (mainly single fibers) of unknown origin. However, all these particles were <  
165 1 mm and thus did not contribute to the MP counts used in the statistical analysis. If quantifiable  
166 amounts of blank contamination with particles > 1 mm were to be found, such samples would be  
167 excluded from any further analyses.

168

169 *Chemical analysis*

170 Following the guidelines of the Swedish National Monitoring Program for Contaminants in  
171 Marine Biota, the muscle samples were analyzed for polychlorinated biphenyls (PCB 28, 52,  
172 101, 118, 138, 153 and 180), organochlorine pesticides (DDE, DDD, DDT, HCB, AHCH, BHCH, and  
173 Lindane) and polybrominated flame retardants (BDE 28, 47, 99, 100, 153, 154 and HBCD). For  
174 most compounds, 10 g of muscle tissue from individual fish were used, whereas 1 g samples of  
175 muscle tissue from 10 individuals were pooled for a few analytically challenging compounds. An  
176 overview of the analyzed contaminants and their average concentrations in herring muscle

177 tissue are provided in Table 1, while details of the analytical procedures and quality assurance  
178 are provided elsewhere (Bignert et al. 2016).

179

180 *Data analysis and statistics*

181 *Relationships between biological factors, geography and ingested microplastic*

182 We used generalized additive models (GAM) in package *mgcv* to examine relationships between  
183 specific biological variables (*weight, gut fullness, age* and *reproductive phase*) and *MP burden*;  
184 *sea basin* was used as a random factor in the model since the inclusion of this term lowered the  
185 Akaike Information Criterion from 323 to 270. The model was specified as:

186

187  $MP\ burden = \beta s(weight) + s(gut\ fullness) + s(age) + s(reproductive\ phase) + random(sea\ basin) +$   
188  $\epsilon$

189

190 The multicollinearity between the explanatory variables was evaluated as low ( $< 0.38$ ) using  
191 concavity measures (Amodio et al. 2014) calculated by the *mgcv*-package. Due to the  
192 overrepresentation of zeros in the data (overdispersion) for the MP burden, the model was run  
193 using zero-inflated Poisson error structures. Model performance was assessed using residual  
194 plots. Differences in the MP burden between the basins were tested using Permanova with  
195 *station* nested within *basin* as a random factor (Anderson 2001). The significance level was set at  
196  $\alpha = 0.05$ ; all statistical analyses were conducted in R 3.5.0 (R Core Team 2014).

197

198 *Relationships between HOCs and ingested microplastic*

199 Maximum-likelihood Factor Analysis with Varimax rotation was used to assess the degree of  
200 association between the chemical variables and weight-specific MP burden in the GIT. Prior to  
201 the analysis, Bartlett's test of sphericity was performed to confirm patterned relationships  
202 between the variables and was statistically significant ( $\chi^2_{15} = 176$ ,  $p < 0.0001$ ). A scree plot was  
203 used to determine the number of factors to retain, and factor loadings  $> 0.7$  were considered  
204 statistically significant (MacCallum et al. 2001). When measured values were below the limit of  
205 quantification (LOQ), they were imputed by LOQ divided by the square root of two (Succop et al.  
206 2004). The analyzed chemical concentrations were summed and grouped into their respective  
207 contaminant groups (PCBs, PBDEs and organochlorine pesticides).

208

209 *Modeling plastic ingestion by herring*

210 To evaluate whether the observed MP burden could be predicted using ambient MP abundance  
211 data and food processing rates, we modeled the ingestion of MP using literature-derived  
212 parameters on food uptake, egestion, and MP abundance in the study area. The rationale is that  
213 observed MP abundance in the gut would reflect average exposure levels assuming that (1) MP  
214 concentrations are fairly homogeneous in the outer coastal areas (Gorokhova 2015, Gewert et  
215 al. 2017), which are the main feeding grounds of herring (Flinkman et al. 1998), (2) the MP  
216 abundance in the water column, where the fish feed, is similar to that at the surface, where the  
217 data on the relevant size fraction of MP (1- 5 mm) were collected; (3) MP ingestion by herring is  
218 non-selective and thus proportional to the MP abundance in the water, and (4) gut evacuation  
219 rates are non-discriminatory, i.e., MP are egested at the same rate as prey remains. Then, the

220 MP burden ( $MP \text{ ind}^{-1}$ ) at any given time,  $t$ , can be written as the mass balance between the uptake  
221 and loss rates (Eq. 1):

222

$$223 \quad MP_t = MP(t - dt) + (IR - Eg) dt, \quad (1)$$

224 where  $IR$  and  $ER$  are the ingestion and egestion rates ( $MP \text{ h}^{-1}$ ), respectively. They can be  
225 calculated as:

$$226 \quad IR = CMP \times CR \quad (2)$$

227 and

$$228 \quad ER = GER \times MP_t, \quad (3)$$

229 where  $CMP$  is the ambient MP concentration (number of  $MP \text{ L}^{-1}$ ),  $CR$  is the clearance rate ( $\text{L h}^{-1}$ ;  
230 the volume of water swept clear of particles per individual and hour), and  $GER$  is the gut  
231 evacuation rate ( $\text{h}^{-1}$ ).

232

233 We used literature data to parameterize the model (Supporting Information Figure S 1, Table S  
234 3). The MP concentrations in the target size range (1-5 mm) from surface waters in the outer  
235 Stockholm archipelago (Gewert et al. 2017) were used as  $CMP$  values. Clearance rates were  
236 estimated using reported feeding rates for North Sea herring on *Calanus finmarchicus*, a  
237 copepod of similar size as the microplastics considered here, and the main prey for herring  
238 (Varpe and Fiksen 2010) (see Supporting Information 2.1 for the calculation of  $CR$ ). As published  
239 gut evacuation rates for adult herring were not available, we used experimental values  
240 reported for other clupeids of similar size, European pilchard (*Sardina pilchardus*) (Costalago

241 and Palomera 2014) and South American pilchard (*Sardinops sagax*) (van der Lingen 1998),  
242 which have similar feeding ecology and physiology as Baltic herring (Collard et al. 2017). The  
243 physiological rates used in the model corresponded to the average size of our fish.

244  
245 The model was implemented using STELLA® ver. 9.4.1 software (iSee systems, Inc. Lebanon, NH,  
246 U.S.A.) to estimate MP burden (MP ind<sup>-1</sup>) dynamics in a fish population at a given MP abundance.  
247 The intrapopulation variability was simulated using a Monte Carlo generator with 1000  
248 permutations (details on the simulation settings are provided in Supporting Information 2.2). To  
249 validate the model, we compared the simulated data distribution from the model to the field  
250 data using descriptive statistics,  $\chi^2$ , and the two-sample Cramér-von Mises tests.

251

## 252 **Results**

### 253 *Observed MP burden*

254 Particles identified by visual inspection as MP were found in 44 out of the 130 individuals (33.8%;  
255 range: 0 to 51 pieces of plastic fiber or fragments ind<sup>-1</sup>). In these 44 individuals, the mean  
256 abundance was  $7.8 \pm 12.2$  particles ind<sup>-1</sup> ( $\pm$  SD). The dominant type of the MP were fibers of  
257 various colors (87.6%), while fragments were less frequent (12.4%). However, only 38.5 % of the  
258 putative MP were classified as either synthetic or semi-synthetic (viscose) by FTIR and 38.5%  
259 were classified as being of natural origin (e.g. chitin, fur and cellulose); 23 % could not be  
260 identified (Supporting information Table S 1). None of the samples exclusively matched the most  
261 commonly found polymers in the environment; polyethylene (PE), polypropylene (PP),  
262 polystyrene (PS), polyethylene terephthalate (PET) and polyvinylchloride (PVC).

263

264 After correcting for the proportion of the misclassified samples, only 17 individuals containing  
265 MP remained (13.1 %; range: 0 to 20 MP), with a mean abundance of  $4.5 \text{ MP ind}^{-1} \pm 5.3$ . When  
266 all examined individuals were considered, the population average was  $0.9 \text{ MP ind}^{-1}$ , with the 95%  
267 bootstrap confidence interval ranging  $0.5 - 1.6 \text{ MP ind}^{-1}$ . The variation in the MP burden between  
268 the stations and basins was high (Figure 2, Supporting information Table S 2) and no significant  
269 differences in the MP burden between the basins were found (*station* nested within *basin* as a  
270 random factor, pseudo  $F_{4,117} = 0.9$ ,  $p = 0.49$ ).

271

#### 272 *Predicted vs. observed MP burden and frequency of occurrence*

273 The model predicted that 81% of fish contained MP, with a mean MP burden of  $4.7 \text{ MP ind}^{-1}$ ;  
274 these values were about five times as high as the observed values. The ranges of the frequency  
275 distributions for the simulated and observed values were overlapping, although the field  
276 observations were more strongly skewed towards zero values compared to the model  
277 prediction (Figure 3 A; Supporting Information Table S 4). The difference between the  
278 distributions was statistically significant (Cramér-von Mises  $T = 186$ ,  $p < 0.0001$ ). However,  
279 when zero values were excluded, the distributions, albeit still significantly different (Cramér-  
280 von Mises  $T = 10.6$ ,  $p < 0.01$ ), became more similar (Figure 3 B; Supporting Information Table S  
281 4), indicating that much of the difference between the distributions was driven by the  
282 significantly higher proportion of zero observations in the field data ( $\chi^2 = 219.5$ ,  $p < 0.0001$ ).

283

#### 284 *Linkage between MP intake and HOCs*

285 We found no relationship between the weight-specific MP burden and the concentration of any  
286 of the HOCs (Figure 4). Together, the two factors explained a cumulative variance of 84.4%  
287 (Supporting Information Table S 5). As a variable, weight-specific MP burden loaded weakly and  
288 negatively (-0.14) on the first axis and moderately positive (0.58) on the second axis. In contrast,  
289 the organochlorine pesticides and PBDEs loaded significantly and positively on the first axis, while  
290 the PCBs loaded moderately positive (0.56) on the first and significantly positive (0.82) on the  
291 second axis. Hence, no contaminant group had loadings clustering with those for the weight-  
292 specific MP burden.

293

#### 294 *Biological factors related to MP burden*

295 The MP burden was positively and nearly linearly related to fish *body weight* (GAM,  $\chi^2 = 13.1$ ,  $p$   
296  $< 0.01$ , Figure 5 A). In contrast, a negative effect was found for *reproductive phase*, where MP  
297 burden was significantly lower in fish that had reached sexual maturity (GAM  $\chi^2 = 16.4$ ,  $p < 0.01$ ,  
298 Figure 5 B). *Gut fullness* only had a negative effect on MP burden when the GIT was empty of  
299 food items (GAM  $\chi^2 = 39.4$ ,  $p < 0.0001$ , Figure 5 C) while *Age* displayed a weak negative  
300 relationships with MP burden (GAM  $\chi^2 = 16.6$ ,  $p < 0.001$ , Figure 5 D).

301

## 302 **Discussion**

### 303 *Microplastics are common but not abundant in herring guts*

304 Microplastics (mostly fibers of synthetic and semi-synthetic origin) were found in about 20% of  
305 the fish. While these values are in good agreement with those reported for herring by Beer et al.

306 (2018) for the central Baltic Sea (20% containing MP, with 93% fibers), other studies report  
307 considerably lower MP frequency of occurrence and fiber contribution to total MP in herring.  
308 Both Foekema et al. (2013) and Rummel et al. (2016) found plastics in only 2% of herring samples  
309 from the North Sea and the Southern Baltic Sea, with fibers accounting for less than 10% of MP.  
310 Having excluded fibers from their analyses, Budimir et al. (2018) reported a frequency of  
311 occurrence as low as 1.8% in herring from the northern Baltic Sea. These discrepancies between  
312 different studies could be related to differences in fish size and gut fullness. For example,  
313 Foekema et al. (2013) used fish that were considerably larger (>200 mm total length) which most  
314 likely already had switched from filter feeding to raptorial feeding on larger prey (Huse and  
315 Toresen 1996). This change in feeding mode would result in a lower ingestion rate of  
316 zooplankton-sized plastic particles and thus in a lower overall MP burden. In the study of Rummel  
317 et al. (2016), many fish stomachs were empty, which probably was related to arrested feeding in  
318 concert with spawning, and, possibly, stress-induced gut evacuation caused by the fish sampling  
319 (Wilkins 1967, Vinson and Angradi 2011). This lends further support to our findings that MP  
320 burden increases with fish size (Beer et al. 2018) and decreases with reproductive phase (Stacey  
321 and Hourston 1982). In addition, one would expect the amount of ingested MP to scale with the  
322 absolute size of bolus or gut fullness. However, since this relationship was weak (Figure 5 C), our  
323 findings only partly support this expectation. One possible explanation for this could be slower  
324 egestion of MP compared to prey, similar to the selective retention of plastic fibers in amphipods  
325 (Au et al. 2015) and fragments in cladocerans (Ogonowski et al. 2016), which would result in a  
326 temporary accumulation of MP in the fish gut and obscure the expected positive relationship  
327 between the gut fullness and MP burden. While fish size appears to be the strongest covariable  
328 for standardizing gut MP content, gut fullness was also influential, particularly for fish with empty  
329 guts, which may occur during fasting periods (Darbyson et al. 2003). Although the effect of *Age*



330 also was statistically significant, the effect was not particularly strong and most probably of low  
331 biological importance.

332

333 The range of the MP burden predicted by our simple model was similar to that observed in the  
334 field caught specimens, although the proportion of fish predicted to contain MP was more than  
335 fivefold higher (Figure 3 A). This is, however, not surprising because, the frequency of zero values  
336 was driven by the variability in MP occurrence in the water that was derived from surface-  
337 collected MP. Moreover, the model assumed homogeneous MP distribution in the water column,  
338 which is unlikely, because the MP distribution is patchy varying with depth (Gorokhova 2015).  
339 Also, MP can form aggregates that are too large to be mistaken for food (Long et al. 2015, Lagarde  
340 et al. 2016). Therefore, the distribution of MP concentrations originating from surface collections  
341 and used to model MP encounter rate might not reflect the actual abundance of MP available to  
342 the fish. The observed MP burden for the population was also more variable, which is likely to be  
343 related to diel variations in feeding and gut evacuation under natural conditions (Seyhan and  
344 Grove 2003), not accounted for by the model. Other biological factors, such as maturity level,  
345 ontogenetic changes in feeding, and behavior, may have affected the probability of MP ingestion  
346 and thus contributed to the intrapopulation variability in the MP burden. Finally, fishing methods  
347 (which may induce gut evacuation) and time of capture (which may reflect diurnal differences in  
348 feeding activity) may have contributed to the observed discrepancy in the MP burden  
349 distribution. Nevertheless, given the simplicity of the model and the uncertainties associated  
350 with its parameters, the predicted values were sufficiently close to those found in the field,  
351 indicating that MP uptake can be predicted provided that we have reliable MP abundance  
352 estimates.

353

354 *No correlation between weight-specific MP burden and HOCs*

355 The transfer of hydrophobic contaminants from ingested plastics to biota has been described as  
356 the so-called "Trojan horse" effect (Cole et al. 2011). While this transfer has been demonstrated  
357 under laboratory conditions (Besseling et al. 2013, Rochman et al. 2013, Browne et al. 2013, Batel  
358 et al. 2016), recent modelling studies indicate that natural sources are much more important  
359 than MP in explaining HOC bioaccumulation patterns in aquatic organisms (Koelmans 2015,  
360 Koelmans et al. 2016, Mohamed Nor and Koelmans 2019). We did not find any correlation  
361 between HOC concentrations in herring muscle and MP burden, although it could be argued that  
362 omitting small MP (< 1 mm) from our analysis, could have biased the results. Indeed, by focusing  
363 on the larger MP, we ignored the potentially important influence of a higher total surface area  
364 and thus higher HOC desorption rates (Hendriks et al. 2001, Hartmann et al. 2017). However, the  
365 ingestion of such small particles by fish of this size is rather unlikely, because filter-feeding herring  
366 have a relatively low capacity to retain small particles due to their rather wide gill raker spacing  
367 (Gibson 1988, Collard et al. 2017) and actively avoid smaller prey while feeding raptorially (Aro  
368 et al. 1989, Casini et al. 2004). In fact, this line of reasoning has been supported by several other  
369 studies reporting a predominant retention of MP of > 1 mm by similarly-sized herring (Lenz et al.  
370 2016, Collard et al. 2017, Beer et al. 2018). Moreover, given the short residence time (Grigorakis  
371 et al. 2017) of ingested plastics and the slow desorption kinetics of many HOCs, the lack of  
372 correlation between the MP and organic contaminants is rather expected and in line with other  
373 reports for fish and other aquatic animals (Herzke et al. 2016, Rehse et al. 2018, Kleinteich et al.  
374 2018).

375

376 Causality is difficult to prove using environmental samples, where many different parameters  
377 may affect contaminant body burden of an organism (Hartmann et al. 2017), including various  
378 biotic factors that have significant effects on both MP (this study) and HOC levels (Persson et al.  
379 2013, Silva Barni et al. 2014). However, our findings suggest that there is no tenable relationship  
380 between the MP intake and tissue contaminant concentrations in the Baltic herring (Figure 4).  
381 Similarly, no correlation has been found between the amount of ingested plastic and HOC  
382 concentrations in northern fulmars (*Fulmarus glacialis*) from the Norwegian coast (Herzke et al.  
383 2016), even though the birds had ingested much larger amounts of plastic and their gut passage  
384 time for plastic debris is several orders of magnitude longer than in herring (Ryan 2015). This lack  
385 of relationship is also supported by the relatively constant MP burden observed in Baltic herring  
386 over the past three decades (Beer et al. 2018), while muscle concentrations of HOCs have  
387 decreased significantly (Bignert et al. 2016). The mass-balance model indicates that our  
388 measurements of the MP burden are ecologically plausible given the currently reported  
389 abundances of MP in the Baltic surface water, thus supporting the reliability of the MP burden  
390 estimates in the Baltic herring reported here and in other studies and providing confidence in the  
391 methods employed. Taken together, these findings contrast the currently held paradigm that  
392 microplastics are an important source of HOCs in aquatic organisms (Mato et al. 2001, Rochman  
393 et al. 2013).

394

### 395 *Acknowledgements*

396 This work was supported through the Joint Programming Initiative Healthy and Productive Seas  
397 and Oceans (JPI-Oceans) WEATHER-MIC project by the Swedish Research Council for  
398 Environment, Agricultural Sciences and Spatial Planning (FORMAS) [grant number 942-2015-

399 1866], FORMAS project; ir-PLAST [grant number 2015-932], through the joint Baltic Sea research  
400 and development programme (BONUS) MICROPOLL project by the Swedish Innovation Agency  
401 VINNOVA [grant number 2017-00979] and the Baltic Ecosystem Adaptive Management (BEAM)  
402 project. The study was designed, analyzed and compiled solely at the responsibility of the authors  
403 without the involvement of the funding agencies. Preliminary results were presented at the 15<sup>th</sup>  
404 International Conference on Environmental Science and Technology in 2017, Rhodes, Greece,  
405 paper number: CEST2017\_00690. A preprint of this manuscript has been deposited in BioRxiv;  
406 DOI: <https://doi.org/10.1101/363127>.

407

408 **References**

- 409 Ahlbeck, I., S. Hansson, O. Hjerne, and C. W. Ramcharan. 2012. Evaluating fish diet analysis  
410 methods by individual-based modelling. *Canadian Journal of Fisheries and Aquatic*  
411 *Sciences* 69:1184–1201.
- 412 Amodio, S., M. Aria, and A. D’Ambrosio. 2014. On concavity in nonlinear and nonparametric  
413 regression models. *Statistica* 74:85–98.
- 414 Anderson, M. J. 2001. A new method for non-parametric multivariate analysis of variance.  
415 *Austral Ecology* 26:32–46.
- 416 Aro, E., I. Vuorinen, and J. Flinkman. 1989. The prey preference of Baltic herring in the northern  
417 Baltic Sea. International Council for the Exploration of the Sea, Copenhagen (Denmark).
- 418 Au, S. Y., T. F. Bruce, W. C. Bridges, and S. J. Klaine. 2015. Responses of *Hyalella azteca* to acute  
419 and chronic microplastic exposures: Effects of Microplastic Exposure on *Hyalella azteca*.  
420 *Environmental Toxicology and Chemistry* 34:2564–2572.
- 421 Batel, A., F. Linti, M. Scherer, L. Erdinger, and T. Braunbeck. 2016. Transfer of benzo[a]pyrene  
422 from microplastics to *Artemia nauplii* and further to zebrafish via a trophic food web  
423 experiment: CYP1A induction and visual tracking of persistent organic pollutants.  
424 *Environmental Toxicology and Chemistry* 35:1656–1666.
- 425 Beer, S., A. Garm, B. Huwer, J. Dierking, and T. G. Nielsen. 2018. No increase in marine  
426 microplastic concentration over the last three decades – A case study from the Baltic  
427 Sea. *Science of The Total Environment* 621:1272–1279.

- 428 Besseling, E., A. Wegner, E. M. Foekema, M. J. van den Heuvel-Greve, and A. A. Koelmans. 2013.  
429 Effects of Microplastic on Fitness and PCB Bioaccumulation by the Lugworm *Arenicola*  
430 *marina* (L.). *Environmental Science & Technology* 47:593–600.
- 431 Bignert, A., S. Danielsson, S. Faxneld, and E. Nyberg. 2016. Comments Concerning the National  
432 Swedish Contaminant Monitoring Programme in Marine Biota. Stockholm, Sweden.
- 433 Browne, M. A., S. J. Niven, T. S. Galloway, S. J. Rowland, and R. C. Thompson. 2013. Microplastic  
434 Moves Pollutants and Additives to Worms, Reducing Functions Linked to Health and  
435 Biodiversity. *Current Biology* 23:2388–2392.
- 436 Bucholtz, R. H., J. Tomkiewicz, and J. Dalskov. 2008. Manual to determine gonadal maturity of  
437 herring (*Clupea harengus* L.). Pages 1–45. DTU Aqua-report 197-08, National Institute of  
438 Aquatic Resources, Charlottenlund.
- 439 Budimir, S., O. Setälä, and M. Lehtiniemi. 2018. Effective and easy to use extraction method  
440 shows low numbers of microplastics in offshore planktivorous fish from the northern  
441 Baltic Sea. *Marine Pollution Bulletin* 127:586–592.
- 442 Casini, M., M. Cardinale, and F. Arrhenius. 2004. Feeding preferences of herring ( *Clupea*  
443 *harengus* ) and sprat ( *Sprattus sprattus* ) in the southern Baltic Sea. *ICES Journal of*  
444 *Marine Science* 61:1267–1277.
- 445 Cole, M., P. Lindeque, E. Fileman, C. Halsband, and T. S. Galloway. 2015. The Impact of  
446 Polystyrene Microplastics on Feeding, Function and Fecundity in the Marine Copepod  
447 *Calanus helgolandicus*. *Environmental Science & Technology* 49:1130–1137.

- 448 Cole, M., P. Lindeque, E. Fileman, C. Halsband, R. Goodhead, J. Moger, and T. S. Galloway. 2013.  
449 Microplastic Ingestion by Zooplankton. *Environmental Science & Technology* 47:6646–  
450 6655.
- 451 Cole, M., P. Lindeque, C. Halsband, and T. S. Galloway. 2011. Microplastics as contaminants in  
452 the marine environment: A review. *Marine Pollution Bulletin* 62:2588–2597.
- 453 Collard, F., B. Gilbert, G. Eppe, L. Roos, P. Compère, K. Das, and E. Parmentier. 2017.  
454 Morphology of the filtration apparatus of three planktivorous fishes and relation with  
455 ingested anthropogenic particles. *Marine Pollution Bulletin* 116:182–191.
- 456 Costalago, D., and I. Palomera. 2014. Feeding of European pilchard (*Sardina pilchardus*) in the  
457 northwestern Mediterranean: from late larvae to adults. *Scientia Marina* 78:41–54.
- 458 Darbyson, E., D. P. Swain, D. Chabot, and M. Castonguay. 2003. Diel variation in feeding rate  
459 and prey composition of herring and mackerel in the southern Gulf of St Lawrence.  
460 *Journal of Fish Biology* 63:1235–1257.
- 461 Dehaut, A., A.-L. Cassone, L. Frère, L. Hermabessiere, C. Himber, E. Rinnert, G. Rivière, C.  
462 Lambert, P. Soudant, A. Huvet, G. Duflos, and I. Paul-Pont. 2016. Microplastics in  
463 seafood: Benchmark protocol for their extraction and characterization. *Environmental*  
464 *Pollution* 215:223–233.
- 465 EFSA Panel on Contaminants in the Food Chain (CONTAM). 2016. Presence of microplastics and  
466 nanoplastics in food, with particular focus on seafood. *EFSA Journal* 14:n/a-n/a.
- 467 Flinkman, J., E. Aro, I. Vuorinen, and M. Viitasalo. 1998. Changes in northern Baltic zooplankton  
468 and herring nutrition from 1980s to 1990s: top-down and bottom-up processes at work.  
469 *Mar Ecol Prog Ser* 165:127–136.

- 470 Foekema, E. M., C. De Gruijter, M. T. Mergia, J. A. van Franeker, A. J. Murk, and A. A. Koelmans.  
471 2013. Plastic in North Sea Fish. *Environmental Science & Technology* 47:8818–8824.
- 472 Gewert, B., M. Ogonowski, A. Barth, and M. MacLeod. 2017. Abundance and composition of  
473 near surface microplastics and plastic debris in the Stockholm Archipelago, Baltic Sea.  
474 *Marine Pollution Bulletin* 120:292–302.
- 475 Gibson, R. N. 1988. Development, morphometry and particle retention capability of the gill  
476 rakers in the herring, *Clupea harengus* L. *Journal of Fish Biology* 32:949–962.
- 477 Gorokhova, E. 2015. Screening for microplastic particles in plankton samples: How to integrate  
478 marine litter assessment into existing monitoring programs? *Marine Pollution Bulletin*.
- 479 Gouin, T., N. Roche, R. Lohmann, and G. Hodges. 2011. A Thermodynamic Approach for  
480 Assessing the Environmental Exposure of Chemicals Absorbed to Microplastic.  
481 *Environmental Science & Technology* 45:1466–1472.
- 482 Grigorakis, S., S. A. Mason, and K. G. Drouillard. 2017. Determination of the gut retention of  
483 plastic microbeads and microfibers in goldfish (*Carassius auratus*). *Chemosphere*  
484 169:233–238.
- 485 Hartmann, N. B., S. Rist, J. Bodin, L. H. Jensen, S. N. Schmidt, P. Mayer, A. Meibom, and A. Baun.  
486 2017. Microplastics as vectors for environmental contaminants: Exploring sorption,  
487 desorption, and transfer to biota. *Integrated Environmental Assessment and*  
488 *Management* 13:488–493.
- 489 Hendriks, A. J., A. van der Linde, G. Cornelissen, and D. T. H. M. Sijm. 2001. The power of size. 1.  
490 Rate constants and equilibrium ratios for accumulation of organic substances related to



- 491 octanol-water partition ratio and species weight. *Environmental Toxicology and*  
492 *Chemistry* 20:1399–1420.
- 493 Herzke, D., T. Anker-Nilssen, T. H. Nøst, A. Götsch, S. Christensen-Dalsgaard, M. Langset, K.  
494 Fangel, and A. A. Koelmans. 2016. Negligible Impact of Ingested Microplastics on Tissue  
495 Concentrations of Persistent Organic Pollutants in Northern Fulmars off Coastal Norway.  
496 *Environmental Science & Technology* 50:1924–1933.
- 497 Hidalgo-Ruz, V., L. Gutow, R. C. Thompson, and M. Thiel. 2012. Microplastics in the Marine  
498 Environment: A Review of the Methods Used for Identification and Quantification.  
499 *Environmental Science & Technology* 46:3060–3075.
- 500 Huse, G., and R. Toresen. 1996. A comparative study of the feeding habits of herring (*clupea*  
501 *harengus*, *clupeidae*, 1.) and capelin (*mallotus villosus*, *osmeridae*, müller) in the barents  
502 sea. *Sarsia* 81:143–153.
- 503 Jovanović, B. 2017. Ingestion of microplastics by fish and its potential consequences from a  
504 physical perspective. *Integrated Environmental Assessment and Management* 13:510–  
505 515.
- 506 Kleinteich, J., S. Seidensticker, N. Marggrander, and C. Zarfl. 2018. Microplastics Reduce Short-  
507 Term Effects of Environmental Contaminants. Part II: Polyethylene Particles Decrease  
508 the Effect of Polycyclic Aromatic Hydrocarbons on Microorganisms. *International*  
509 *Journal of Environmental Research and Public Health* 15:287.
- 510 Koelmans, A. A. 2015. Modeling the Role of Microplastics in Bioaccumulation of Organic  
511 Chemicals to Marine Aquatic Organisms. A Critical Review. Pages 309–324 in *M.*

- 512 Bergmann, L. Gutow, and M. Klages, editors. Marine Anthropogenic Litter. Springer  
513 International Publishing, Cham.
- 514 Koelmans, A. A., A. Bakir, G. A. Burton, and C. R. Janssen. 2016. Microplastic as a Vector for  
515 Chemicals in the Aquatic Environment: Critical Review and Model-Supported  
516 Reinterpretation of Empirical Studies. *Environmental Science & Technology*:3315–3326.
- 517 Lagarde, F., O. Olivier, M. Zanella, P. Daniel, S. Hiard, and A. Caruso. 2016. Microplastic  
518 interactions with freshwater microalgae: Hetero-aggregation and changes in plastic  
519 density appear strongly dependent on polymer type. *Environmental Pollution* 215:331–  
520 339.
- 521 Lenz, R., K. Enders, T. Kirk Sørensen, and C. A. Stedmon. 2016. Analysis of microplastic in the  
522 stomachs of herring and cod from the North Sea and Baltic Sea. Page 30. DTU Aqua-  
523 report, DTU Aqua National Institute of Aquatic Resources, Copenhagen, Denmark.
- 524 van der Lingen, C. D. 1998. Gastric evacuation, feeding periodicity and daily ration of sardine  
525 *Sardinops sagax* in the southern Benguela upwelling ecosystem. *South African Journal of*  
526 *Marine Science* 19:305–316.
- 527 Long, M., B. Moriceau, M. Gallinari, C. Lambert, A. Huvet, J. Raffray, and P. Soudant. 2015.  
528 Interactions between microplastics and phytoplankton aggregates: Impact on their  
529 respective fates. *Marine Chemistry* 175:39–46.
- 530 Lusher, A. L., G. Hernandez-Milian, J. O'Brien, S. Berrow, I. O'Connor, and R. Officer. 2015.  
531 Microplastic and macroplastic ingestion by a deep diving, oceanic cetacean: The True's  
532 beaked whale *Mesoplodon mirus*. *Environmental Pollution* 199:185–191.

- 533 Lusher, A. L., M. McHugh, and R. C. Thompson. 2013. Occurrence of microplastics in the  
534 gastrointestinal tract of pelagic and demersal fish from the English Channel. *Marine*  
535 *Pollution Bulletin* 67:94–99.
- 536 MacCallum, R. C., K. F. Widaman, K. J. Preacher, and S. Hong. 2001. Sample Size in Factor  
537 Analysis: The Role of Model Error. *Multivariate Behavioral Research* 36:611–637.
- 538 Mato, Y., T. Isobe, H. Takada, H. Kanehiro, C. Ohtake, and T. Kaminuma. 2001. Plastic Resin  
539 Pellets as a Transport Medium for Toxic Chemicals in the Marine Environment.  
540 *Environmental Science & Technology* 35:318–324.
- 541 Mohamed Nor, N. H., and A. A. Koelmans. 2019. Transfer of PCBs from microplastics under  
542 simulated gut fluid conditions is biphasic and reversible. *Environmental Science &*  
543 *Technology*.
- 544 Norén, F. 2007. Small plastic particles in Swedish West Coast Waters. KIMO Sweden, Lysekil,  
545 Sweden.
- 546 Ogonowski, M., C. Schür, Å. Jarsén, and E. Gorokhova. 2016. The Effects of Natural and  
547 Anthropogenic Microparticles on Individual Fitness in *Daphnia magna*. *PLOS ONE*  
548 11:e0155063.
- 549 Oliveira, M., A. Ribeiro, and L. Guilhermino. 2012. Effects of short-term exposure to  
550 microplastics and pyrene on *Pomatoschistus microps* (Teleostei, Gobiidae). *Comparative*  
551 *Biochemistry and Physiology Part A: Molecular & Integrative Physiology* 163,  
552 Supplement:S20.
- 553 Persson, S., A. Rotander, B. van Bavel, B. Brunström, B.-M. Bäcklin, and U. Magnusson. 2013.  
554 Influence of age, season, body condition and geographical area on concentrations of

- 555 chlorinated and brominated contaminants in wild mink (*Neovison vison*) in Sweden.  
556 *Chemosphere* 90:1664–1671.
- 557 Primpke, S., M. Wirth, C. Lorenz, and G. Gerdt. 2018. Reference database design for the  
558 automated analysis of microplastic samples based on Fourier transform infrared (FTIR)  
559 spectroscopy. *Analytical and Bioanalytical Chemistry* 410:5131–5141.
- 560 R Core Team. 2014. R: A language and environment for statistical computing. R Foundation for  
561 Statistical Computing, Vienna, Austria.
- 562 Rehse, S., W. Kloas, and C. Zarfl. 2018. Microplastics Reduce Short-Term Effects of  
563 Environmental Contaminants. Part I: Effects of Bisphenol A on Freshwater Zooplankton  
564 Are Lower in Presence of Polyamide Particles. *International Journal of Environmental  
565 Research and Public Health* 15:280.
- 566 Rochman, C. M., E. Hoh, T. Kurobe, and S. J. Teh. 2013. Ingested plastic transfers hazardous  
567 chemicals to fish and induces hepatic stress. *Scientific Reports* 3.
- 568 Rochman, C. M., R. L. Lewison, M. Eriksen, H. Allen, A.-M. Cook, and S. J. Teh. 2014.  
569 Polybrominated diphenyl ethers (PBDEs) in fish tissue may be an indicator of plastic  
570 contamination in marine habitats. *Science of The Total Environment* 476–477:622–633.
- 571 Rummel, C. D., M. G. J. Löder, N. F. Fricke, T. Lang, E.-M. Griebeler, M. Janke, and G. Gerdt. 2016. Plastic ingestion by pelagic and demersal fish from the North Sea and Baltic Sea. *Marine Pollution Bulletin* 102:134–141.
- 574 Rusina, T. P., F. Smedes, and J. Klanova. 2010. Diffusion coefficients of polychlorinated  
575 biphenyls and polycyclic aromatic hydrocarbons in polydimethylsiloxane and low-  
576 density polyethylene polymers. *Journal of Applied Polymer Science* 116:1803–1810.

- 577 Ryan, P. G. 2015. How quickly do albatrosses and petrels digest plastic particles? *Environmental*  
578 *Pollution* 207:438–440.
- 579 Seyhan, K., and D. J. Grove. 2003. A New Approach in Modelling Gastric Emptying in Fish.  
580 *Turkish Journal of Veterinary and Animal Sciences* 27:1043–1047.
- 581 Silva Barni, M. F., M. Gonzalez, and K. S. B. Miglioranza. 2014. Assessment of persistent organic  
582 pollutants accumulation and lipid peroxidation in two reproductive stages of wild  
583 silverside (*Odontesthes bonariensis*). *Ecotoxicology and Environmental Safety* 99:45–53.
- 584 Stacey, N. E., and A. S. Hourston. 1982. Spawning and Feeding Behavior of Captive Pacific  
585 Herring, *Clupea harengus pallasii*. *Canadian Journal of Fisheries and Aquatic Sciences*  
586 39:489–498.
- 587 Succop, P. A., S. Clark, M. Chen, and W. Galke. 2004. Imputation of data values that are less  
588 than a detection limit. *Journal of Occupational and Environmental Hygiene* 1:436–441.
- 589 TemaNord. 1995. Nordic environmental specimen banking: Methods in use in ESB: Manual for  
590 Nordic countries. TemaNord Scandinavia: Nordic Council of Ministers.
- 591 Thompson, R. C., Y. Olsen, R. P. Mitchell, A. Davis, S. J. Rowland, A. W. G. John, D. McGonigle,  
592 and A. E. Russell. 2004. Lost at Sea: Where Is All the Plastic? *Science* 304:838–838.
- 593 Varpe, Ø., and Ø. Fiksen. 2010. Seasonal plankton–fish interactions: light regime, prey  
594 phenology, and herring foraging. *Ecology* 91:311–318.
- 595 Vinson, M. R., and T. R. Angradi. 2011. Stomach Emptiness in Fishes: Sources of Variation and  
596 Study Design Implications. *Reviews in Fisheries Science* 19:63–73.

- 597 Wardrop, P., J. Shimeta, D. Nugegoda, P. D. Morrison, A. Miranda, M. Tang, and B. O. Clarke.  
598 2016. Chemical Pollutants Sorbed to Ingested Microbeads from Personal Care Products  
599 Accumulate in Fish. *Environmental Science & Technology* 50:4037–4044.
- 600 Wesch, C., K. Bredimus, M. Paulus, and R. Klein. 2016. Towards the suitable monitoring of  
601 ingestion of microplastics by marine biota: A review. *Environmental Pollution* 218:1200–  
602 1208.
- 603 Wilkins, N. P. 1967. Starvation of the herring, *Clupea harengus* L.: survival and some gross  
604 biochemical changes. *Comparative biochemistry and physiology* 23:503–518.
- 605
- 606

607 **Figures and tables**

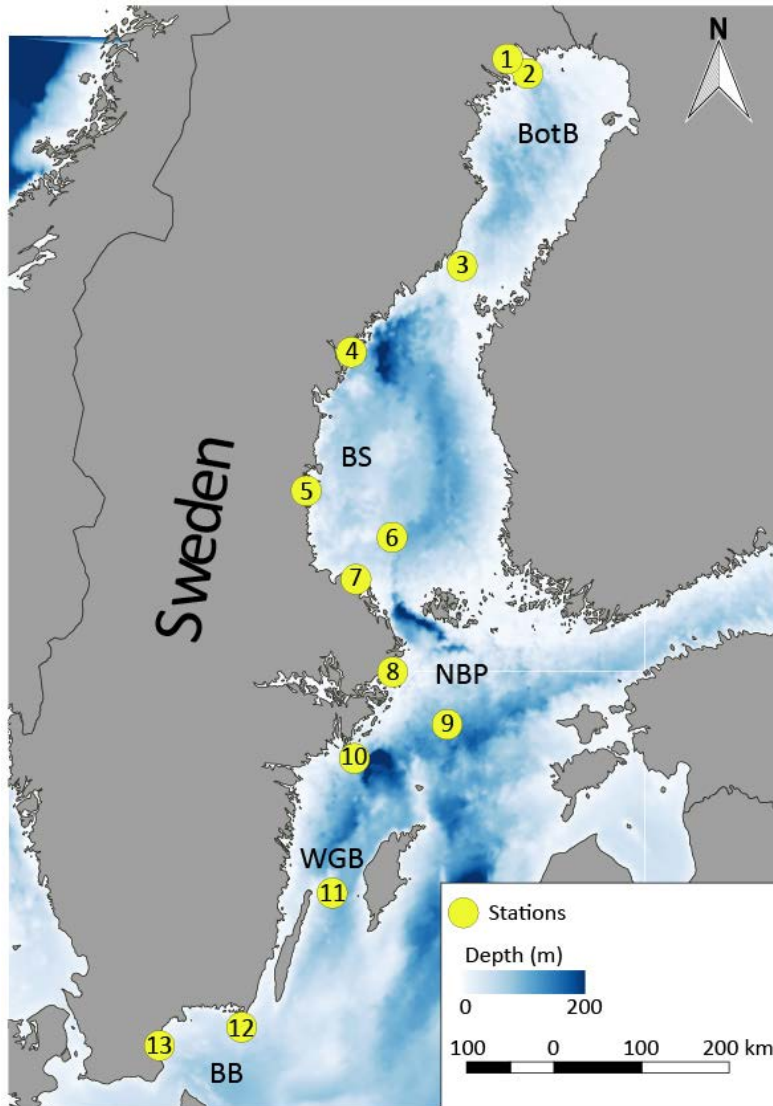

608

609 **Figure 1.** Sampling sites within the Swedish National Monitoring Program for Contaminants in  
610 Marine Biota included in this study, BotB Bothnian Bay, BS Bothnian Sea, NBP Northern Baltic  
611 Proper, WGB Western Gotland Basin and BB Bornholm Basin. 1 Rånefjärden, 2 Harufjärden, 3  
612 Holmöarna, 4 Gaviksfjärden, 5 Långvindsfjärden, 6 Bothnian Sea offshore site, 7  
613 Ängsskärsklubb, 8 Lagnö, 9 Baltic proper offshore site, 10 Landsort, 11 Byxelkrok, 12 Utlängan  
614 and 13 Western Hanö bight.

615

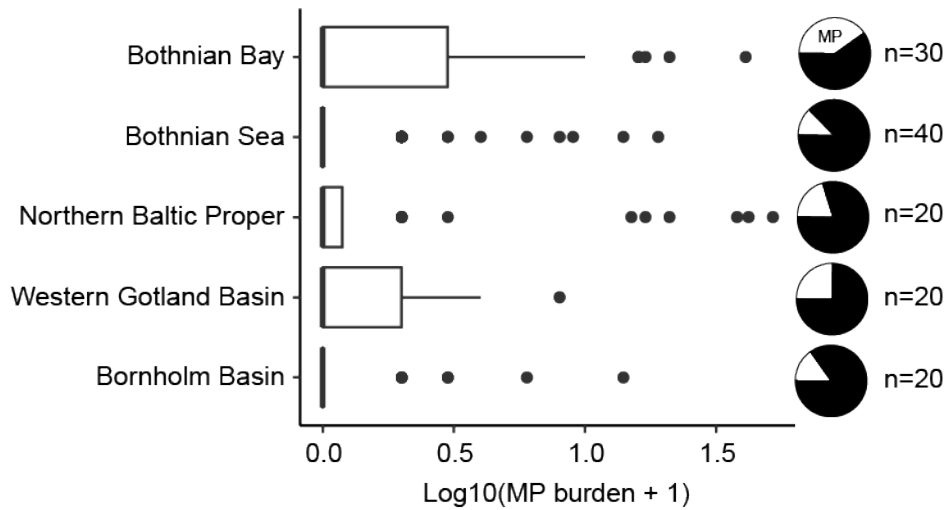

616

617 **Figure 2.** Boxplot of Log10-transformed MP abundance in the gastrointestinal tract (GIT) of  
618 herring per basin ordered from north to south. Data are presented as medians (vertical lines),  
619 inter quartile range, IQR (boxes), 1.5 IQR (whiskers) and outliers (points) being > 1.5 IQR. The  
620 black slices of the pie charts indicate the proportion of examined herring with no MP in the GIT.



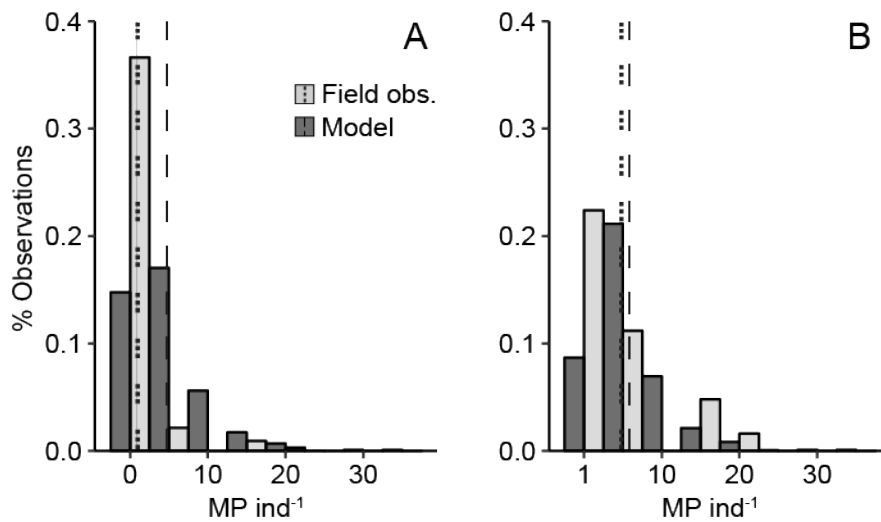

**Figure 3.** Frequency distribution of the MP burden based on the model simulations (dark grey bars) and field observations (light grey bars). Panel A shows the entire dataset and panel B presents only fish with MP in the GIT (i.e., the non-zero values). The dashed vertical lines indicate the mean values for the model simulations (long dash) and the observations (short dash).

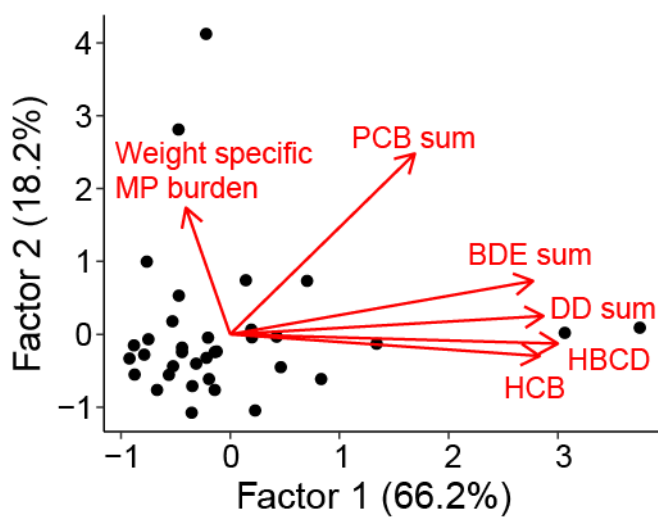

**Figure 4.** Factor scores (axes) and loadings (arrows) of contaminants (HBCD, HCB and the sum of PCBs, BDEs and DDs) and weight-specific MP burden.

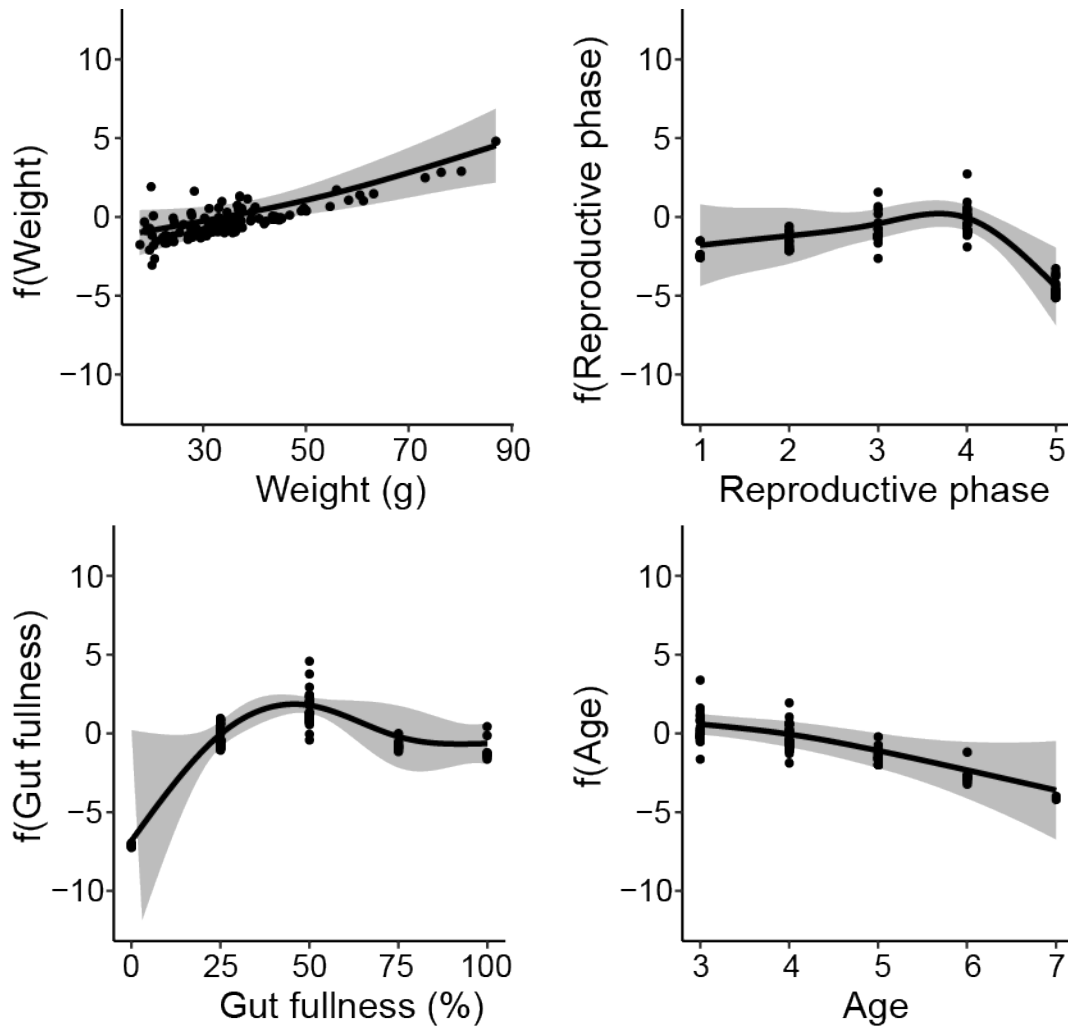

**Figure 5.** Generalized additive models (GAMs) showing partial response curves for the explanatory biological variables: *body weight* (A), *reproductive phase* (B), *gut fullness* (C) and *age* (D). The classes for *reproductive phase* correspond to: 1 = deformed gonads, 2 = post spawned, 3 = juvenile, 4 = developing gonads and 5 = mature gonads. The vertical axis shows the relative influence of the explanatory variable on the prediction of MP burden on the base of partial residuals. Grey bands indicate 95% confidence interval for each curve.

**Table 1.** Overview of the HOCs in herring muscle tissue and descriptive statistics of their concentrations ( $\mu\text{g g}^{-1}$  fish muscle). SD – standard deviation.

| Chemical group                     | Chemical species                            | Abbreviation | Mean concentration in fish muscle ( $\mu\text{g/g}$ ) | SD     | Median | Min    | Max    |
|------------------------------------|---------------------------------------------|--------------|-------------------------------------------------------|--------|--------|--------|--------|
| Polychlorinated biphenyls (PCBs)   | 2,4,4'-PCB                                  | PCB 28       | 0.0039                                                | 0.0019 | 0.0033 | 0.0018 | 0.0106 |
|                                    | 2,2',5,5'-PCB                               | PCB 52       | 0.0067                                                | 0.0044 | 0.0057 | 0.0025 | 0.0199 |
|                                    | 2,2',4,5,5'-PCB                             | PCB 101      | 0.0222                                                | 0.0149 | 0.0176 | 0.0069 | 0.0713 |
|                                    | 2,3',4,4',5'-PCB                            | PCB 118      | 0.0204                                                | 0.0135 | 0.0155 | 0.0062 | 0.0694 |
|                                    | 2,2',3,4,4',5'-PCB                          | PCB 138      | 0.0591                                                | 0.0408 | 0.0444 | 0.0152 | 0.1896 |
|                                    | 2,2',4,4',5,5'-PCB                          | PCB 153      | 0.0417                                                | 0.0280 | 0.0345 | 0.0120 | 0.1320 |
|                                    | 2,2',3,4,4',5,5'-PCB                        | PCB 180      | 0.0181                                                | 0.0114 | 0.0149 | 0.0029 | 0.0551 |
| Organochlorine pesticides          | 4,4'-DDT                                    | DDT          | 0.0205                                                | 0.0218 | 0.0134 | 0.0037 | 0.0966 |
|                                    | 4,4'-DDE                                    | DDE          | 0.1055                                                | 0.0960 | 0.0815 | 0.0160 | 0.4130 |
|                                    | 4,4'-DDD                                    | DDD          | 0.0284                                                | 0.0333 | 0.0163 | 0.0016 | 0.1391 |
|                                    | $\alpha$ -1,2,3,4,5,6-Hexachlorocyclohexane | AHCH         | 0.0029                                                | 0.0005 | 0.0030 | 0.0018 | 0.0039 |
|                                    | $\beta$ -1,2,3,4,5,6-Hexachlorocyclohexane  | BHCH         | 0.0056                                                | 0.0027 | 0.0057 | 0.0018 | 0.0099 |
|                                    | $\gamma$ -1,2,3,4,5,6-Hexachlorocyclohexane | Lindane      | 0.0029                                                | 0.0005 | 0.0030 | 0.0018 | 0.0039 |
| Brominated flame retardants (BDEs) | 2,4,4'-TriBDE                               | BDE 28       | 0.0002                                                | 0.0001 | 0.0002 | 0.0001 | 0.0005 |
|                                    | 2,2',4,4'-TetraBDE                          | BDE 47       | 0.0051                                                | 0.0032 | 0.0041 | 0.0016 | 0.0160 |
|                                    | 2,2',4,4',5-PentaBDE                        | BDE 99       | 0.0012                                                | 0.0009 | 0.0009 | 0.0005 | 0.0044 |
|                                    | 2,2',4,4',6-PentaBDE                        | BDE 100      | 0.0012                                                | 0.0007 | 0.0011 | 0.0004 | 0.0035 |
|                                    | 2,2',4,4',5,5'-HexaBDE                      | BDE 153      | 0.0002                                                | 0.0002 | 0.0002 | 0.0001 | 0.0009 |
|                                    | 2,2',4,4',5,6'-HexaBDE                      | BDE 154      | 0.0006                                                | 0.0004 | 0.0005 | 0.0002 | 0.0018 |
|                                    | 1,2,5,6,9,10-Hexabromocyclododecane         | HBCD         | 0.0114                                                | 0.0096 | 0.0088 | 0.0025 | 0.0470 |
| Other                              | Hexachlorobenzene                           | HCB          | 0.0289                                                | 0.0209 | 0.0246 | 0.0114 | 0.1013 |
