# Supplementary material for: Hydrophobic organic contaminants are not linked to microplastic uptake in Baltic Sea herring
Source: bioRxiv or medRxiv preprint supplement (doi:10.1101/363127), 2019-01-25
Supplement: Supplementary file [file 363127-1.pdf]

1 **Supporting information for**

2 **Hydrophobic organic contaminants are not linked to microplastic uptake in Baltic Sea herring**

3 \*Ogonowski M.<sup>1,2</sup>, Wenman, V.<sup>1</sup>, Danielsson S.<sup>3</sup> and Gorokhova E.<sup>1</sup>

4

5 <sup>1</sup> Department of Environmental Science and Analytical Chemistry, Stockholm University, SE-10691,  
6 Stockholm, Sweden

7 <sup>2</sup> AquaBiota Water Research, Löjtnantsgatan 25, SE-115 50, Stockholm, Sweden

8 <sup>3</sup> Swedish Museum of Natural History, Department of Environmental Science and Monitoring, P. O.  
9 Box 50 007, SE-104 05, Stockholm Sweden

10

11 \*corresponding author:

12 [martin.ogonowski@aces.su.se](mailto:martin.ogonowski@aces.su.se)

13

## 14 **1.1 Model parameterization**

### 15 *1.1.1 Clearance rate (CR)*

16 Clearance rates (CR) for Baltic herring were calculated based on intake rates of *Calanus*  
17 *finmarchicus* in the North Sea (Fig. 5 in Varpe and Fiksen 2010), which is the main prey for  
18 herring in this area. These copepods are also of similar size (2-3 mm prosome length) as the  
19 microplastic particles considered in this study (Pasternak et al. 2004). We used the reported  
20 values on *C. finmarchicus* consumption by herring expressed as (J copepod [J herring]<sup>-1</sup> day<sup>-1</sup>)  
21 and ambient *C. finmarchicus* abundance to obtain the CR.

22  
23 The average CR of the Baltic herring population examined in this study (L h<sup>-1</sup>) was calculated  
24 assuming an energy content of 3.5 kJ and 10 kJ g wet weight<sup>-1</sup> for *C. finmarchicus* and  
25 herring, respectively (Varpe et al. 2005). The average weight of the sampled Baltic herring  
26 (35 g) was used to derive the consumption rate on an individual basis and using a first-order  
27 exponential decay function fitted to data on the CR and prey abundance for the North Sea  
28 herring feeding on *C. finmarchicus* (Fig. S2). The asymptote value ( $1.04 \times 10^3$  L ind.<sup>-1</sup> h<sup>-1</sup>)  
29 was assumed to represent CR of the Baltic herring, because mesozooplankton abundance in  
30 the Baltic Sea normally supersede the maximum reported abundance for *C. finmarchicus* in  
31 the North Sea (cf. Varpe and Fiksen 2010, Gorokhova et al. 2016).

32

### 33 *1.1.2 Ambient MP concentrations in the Baltic Sea (CMP)*

34 We used the average microplastic concentrations reported by Gewert et al. (2017) in the outer  
35 Stockholm archipelago (0.58 MP m<sup>-3</sup>) estimated by surface manta trawls (335 µm mesh).  
36 These values were used, because the size range (median MP size and inter quartile range,  
37 IQR: fragment diameter = 1 mm (IQR 0.6-1.5 mm), fiber length = 1 mm (IQR 1-3 mm)) fits  
38 well the size of MP recovered from the fish guts. Also, the polymer materials have been  
39 rigorously identified by FT-IR in this selection of the field-collected MP, thus ensuring that  
40 the fragments collected were indeed microplastics.

41

### 42 *1.1.3. Gut evacuation rates (GER)*

43 We were not able to find data on gut evacuation rates for adult herring; therefore, a lower and  
44 an upper limit reported for two clupeid species of similar size and feeding ecology as the  
45 herring analyzed here (Collard et al. 2015) were chosen. The lower limit (0.05 h<sup>-1</sup>) was  
46 adopted from the experimental and field data collected for adult South American pilchard  
47 (*Sardinops sagax*) (van der Lingen 1998). The upper limit (0.26 h<sup>-1</sup>) was experimentally  
48 derived for adult European pilchard (*Sardina pilchardus*) (Costalago and Palomera 2014).

49

50

## 51 **1.2 Monte Carlo simulation of MP burden in the Baltic herring**

52

53 To estimate MP burden (MP ind<sup>-1</sup>) dynamics at a given MP abundance from time 0 to the  
54 point when it is stabilized (48 h), we performed Monte Carlo simulation with 1000  
55 permutations using STELLA® ver. 9.4.1 software (iSee systems, Inc. Lebanon, NH, U.S.A.),  
56 with the equations (Eqs. 1 to 3) integrated as shown in figure S3. Ambient MP concentrations  
57 (CMP) were allowed to vary randomly following a Poisson distribution as were the data  
58 presented in Gewert et al. 2017), whereas the CR values were normally distributed with a  
59 mean and SD of 1041 L h<sup>-1</sup> and 27 h<sup>-1</sup>, respectively, and GER values varied randomly  
60 between 0.05 and 0.26 h<sup>-1</sup> without any assumption regarding the distribution (Table S 2). The  
61 final value of each run was used to represent an individual in the population.

62 **SI Tables and Figures**

63 **Table S1.** Descriptive statistics for the microplastics recovered from the gastrointestinal tract of Baltic Sea herring as well as gut fullness of the  
 64 examined fish. For each basin, the number of differently colored fragments and fibers that were recovered from the fish are shown as well as MP  
 65 frequency of occurrence (FO), median, range (min-max) and mean; moreover, the mean values were calculated for all fish and for the fish that  
 66 contained MP in their GIT (i.e., excluding zero values). Gut fullness (GF) is presented as percent of fish with empty stomachs, median gut  
 67 fullness and the corresponding inter-quartile range (IQR). Values in parentheses represent values where non-plastic black fibers > 1 mm have  
 68 been excluded. Data are ordered north to south.

|                        | Fibers     |             |            |            |             | Fragments  |            |             | FO (%)             | Median   | MP total         |                   |                 | GF                    |           |              |
|------------------------|------------|-------------|------------|------------|-------------|------------|------------|-------------|--------------------|----------|------------------|-------------------|-----------------|-----------------------|-----------|--------------|
|                        | Black      | Red         | Brown      | Green      | Clear       | Black      | Red        | Green       |                    |          | Mean all samples | Mean of presences | Range (min-max) | % fish with empty GIT | Median    | IQR          |
| Bothnian Bay           | 0-7        | 0-38        | 0-4        | 0-0        | 0-3         | 0-0        | 0-3        | 0-12        | 46.7 (43.3)        | 0        | 4.1 (3.5)        | 9.5 (8.2)         | 0-38            | 10                    | 50        | 25-50        |
| Bothnian Sea           | 0-8        | 0-18        | 0-0        | 0-0        | 0-5         | 0-7        | 0-0        | 0-2         | 30.0 (22.5)        | 0        | 1.3 (1.0)        | 5.2 (4.3)         | 0-18            | 7.5                   | 25        | 25-50        |
| Northern Baltic Proper | 0-1        | 0-0         | 0-0        | 0-0        | 0-51        | 0-0        | 0-2        | 0-2         | 30.0 (20.0)        | 0        | 6.7 (6.6)        | 32.8 (32.7)       | 0-51            | 25                    | 25        | 19-50        |
| Western Gotland Basin  | 0-1        | 0-3         | 0-0        | 0-1        | 0-1         | 0-0        | 0-7        | 0-0         | 40.0 (30.0)        | 0        | 1.0 (0.9)        | 2.7 (2.6)         | 0-7             | 10                    | 25        | 25-25        |
| Bornholm Basin         | 0-1        | 0-13        | 0-0        | 0-0        | 0-2         | 0-0        | 0-0        | 0-0         | 20.0 (20.0)        | 0        | 0.9 (0.9)        | 4.5 (4.3)         | 0-13            | 0                     | 50        | 25-56        |
| <b>Total</b>           | <b>0-8</b> | <b>0-38</b> | <b>0-4</b> | <b>0-1</b> | <b>0-51</b> | <b>0-7</b> | <b>0-7</b> | <b>0-12</b> | <b>33.8 (28.5)</b> | <b>0</b> | <b>2.7 (2.4)</b> | <b>7.8 (8.4)</b>  | <b>0-51</b>     | <b>9.2</b>            | <b>25</b> | <b>25-50</b> |

69

70

71

72 **Table S2.** Variables and simulation settings used to model microplastic ingestion in Baltic Sea herring. Details regarding derivation of the values  
 73 are provided in the Supporting Information 1.1.

| Parameter        | Unit                                 | Average                | Min                  | Max                    | S.D                   | Distribution | Species                                               | Meaning                                       | Reference                                         |
|------------------|--------------------------------------|------------------------|----------------------|------------------------|-----------------------|--------------|-------------------------------------------------------|-----------------------------------------------|---------------------------------------------------|
| CMP              | MP L <sup>-1</sup>                   | 5.8 × 10 <sup>-4</sup> |                      |                        |                       | Poisson      |                                                       | MP concentration in the water column          | Gewert et al. 2017                                |
| CR               | L ind. <sup>-1</sup> h <sup>-1</sup> | 1.04 × 10 <sup>3</sup> |                      |                        | 2.6 × 10 <sup>2</sup> | Normal       | <i>Clupea harengus</i>                                | Clearance rate                                | Varpe & Fiksen 2010                               |
| GER <sup>1</sup> | h <sup>-1</sup>                      |                        | 5 × 10 <sup>-2</sup> | 2.6 × 10 <sup>-1</sup> |                       |              | <i>Sardinops sagax</i> ,<br><i>Sardina pilchardus</i> | Gut evacuation rate                           | Van der Lingen 1998,<br>Costalago & Palomera 2014 |
| IR               | MP h <sup>-1</sup>                   |                        |                      |                        |                       |              |                                                       | Number of MP ingested at time <i>t</i>        |                                                   |
| MP               | MP                                   |                        |                      |                        |                       |              |                                                       | Number of MP in fish stomach at time <i>t</i> |                                                   |
| Eg               | MP h <sup>-1</sup>                   |                        |                      |                        |                       |              |                                                       | Number of MP egested at time <i>t</i>         |                                                   |

74 1. The lower value for GER is based on data for *Sardinops sagax* (Van der Lingen 1998) while the higher is derived from *Sardina pilchardus* (Costalago & Palomera  
 75 2014).

76 **Table S3.** Descriptive statistics for the predicted (modelled) and observed distributions of the  
 77 MP burden in the Baltic herring. The data are presented as either “Total”, i.e., where  
 78 individuals without MP in the GIT are included, or “Zeros excluded” that shows only the fish  
 79 with positive MP burden.

|          | Total |      | Zeros excluded |      |
|----------|-------|------|----------------|------|
|          | Mod   | Obs  | Mod            | Obs  |
| n        | 1000  | 130  | 806            | 37   |
| Mean     | 4.7   | 2.4  | 5.9            | 8.4  |
| SD       | 4.7   | 7.8  | 4.5            | 12.9 |
| Median   | 3.6   | 0.0  | 4.4            | 2.0  |
| Min      | 0.0   | 0.0  | 1.3            | 1.0  |
| Max      | 33.3  | 51.0 | 33.3           | 51.0 |
| Range    | 33.3  | 51.0 | 32.0           | 50.0 |
| Skew     | 1.8   | 4.4  | 2.0            | 2.0  |
| Kurtosis | 5.0   | 20.0 | 5.7            | 2.8  |
| SE       | 0.1   | 0.7  | 0.2            | 2.1  |

80

81

82 **Table S4.** Summary statistics and factor loadings for the variables used in the factor analysis.  
 83 WS MP burden = weight specific MP burden. Factor loadings > 0.7 are considered  
 84 statistically significant.

|                | Factor 1     | Factor 2     |
|----------------|--------------|--------------|
| WS MP burden   | -0.129       | 0.615        |
| BDE sum        | <b>0.917</b> | 0.258        |
| HBCD           | <b>0.997</b> | -0.026       |
| DD sum         | <b>0.951</b> | 0.099        |
| HCB            | <b>0.943</b> | -0.083       |
| PCB sum        | 0.548        | <b>0.834</b> |
| SS             | 3.946        | 1.158        |
| Proportion var | 0.658        | 0.193        |
| Cumulative var | 0.658        | 0.851        |

85

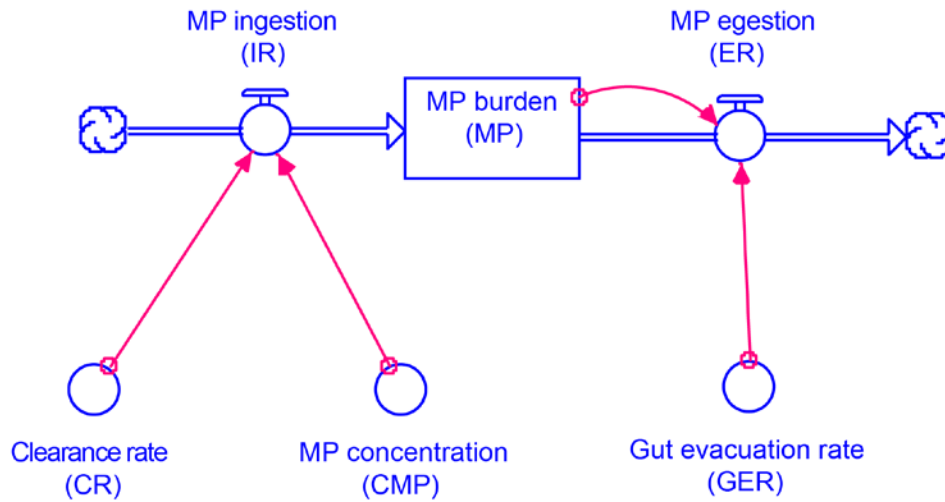

86  
87

88 **Figure S1.** Schematic representation of the model used to predict microplastic ingestion in  
89 Baltic herring.

90  
91

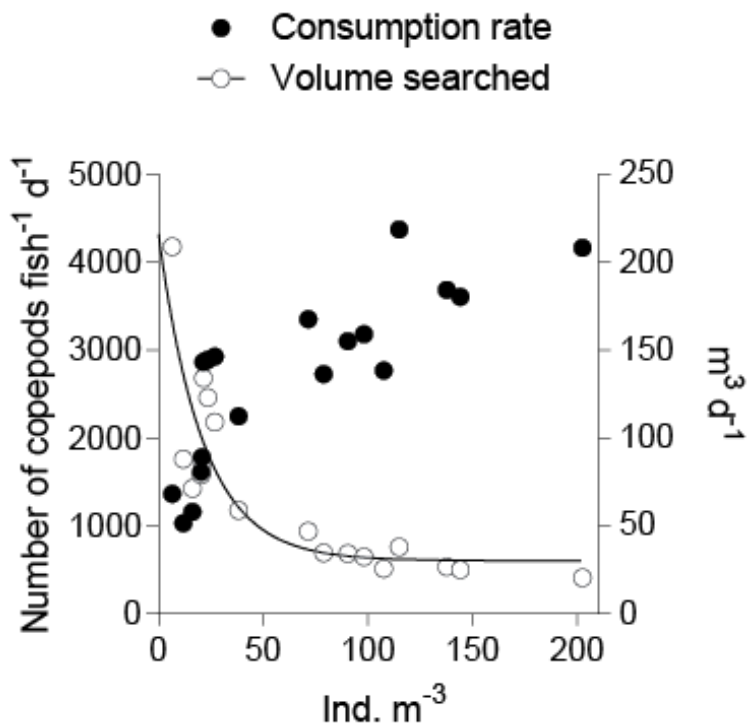

92  
93

94 **Figure S2.** Consumption rates (left axis) and clearance rates (right axis) as a function of  
95 *Calanus finmarchicus* abundance. The values are based on the data presented in Fig. 5, Varpe  
96 and Fiksen (2010) and adjusted for fish with average body weight of 35 g.

97

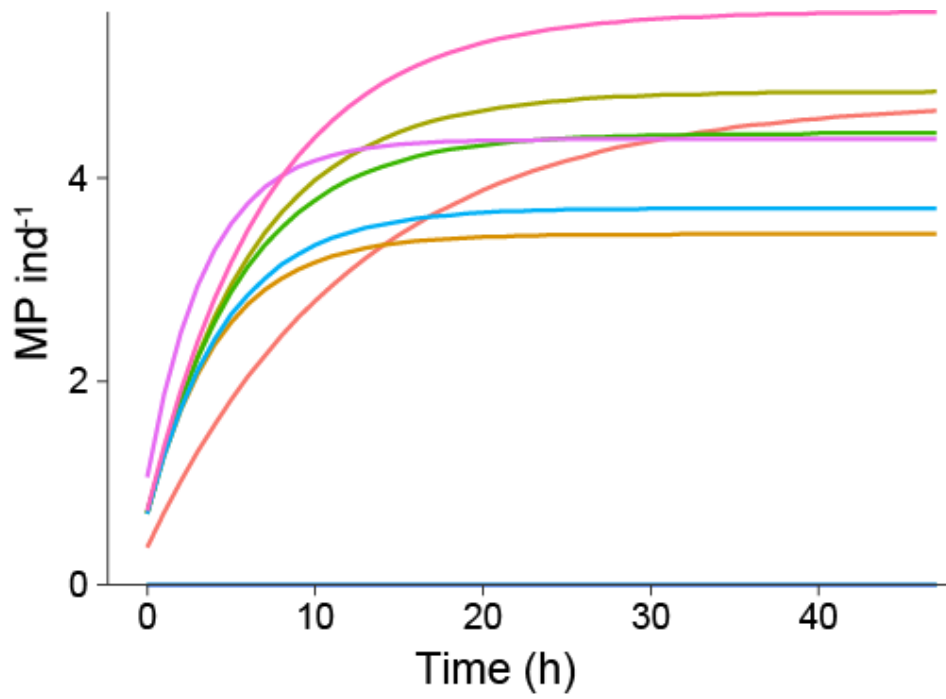

98  
99

100 **Figure S3.** Modeled MP burden (MP ind<sup>-1</sup>) in the first ten simulation runs for 48 h. Observe  
101 that values are stabilized at the end of the simulation; these values are used to represent  
102 intrapopulation variability. Three out of ten individuals contain no MP.

103

104 **References**

105

106 Collard, F., B. Gilbert, G. Eppe, E. Parmentier, and K. Das. 2015. Detection of Anthropogenic

107 Particles in Fish Stomachs: An Isolation Method Adapted to Identification by Raman

108 Spectroscopy. *Archives of Environmental Contamination and Toxicology* 69:331–339.

109 Costalago, D., and I. Palomera. 2014. Feeding of European pilchard (*Sardina pilchardus*) in the

110 northwestern Mediterranean: from late larvae to adults. *Scientia Marina* 78:41–54.

111 Gorokhova E, Lehtiniemi M, Postel L, Rubene G, Amid C, Lesutiene J, Uusitalo L, Strake S,

112 Demereckiene 2016. Indicator properties of Baltic zooplankton for classification of

113 environmental status within Marine Strategy Framework Directive. *PLoS ONE* 11(7):

114 e0158326.doi:10.1371/journal.pone.0158326

115 van der Lingen, C. D. 1998. Gastric evacuation, feeding periodicity and daily ration of sardine

116 *Sardinops sagax* in the southern Benguela upwelling ecosystem. *South African Journal of*

117 *Marine Science* 19:305–316.

118 Ojaveer, H., A. Lankov, T. Raid, A. Põllumäe, and R. Klais. 2018. Selecting for three copepods—

119 feeding of sprat and herring in the Baltic Sea. *ICES Journal of Marine Science*.

120 Pasternak, A., K. S. Tande, E. Arashkevich, and W. Melle. 2004. Reproductive patterns of *Calanus*

121 *finmarchicus* at the Norwegian midshelf in 1997. *Journal of Plankton Research* 26:839–849.

122 Varpe, Ø., and Ø. Fiksen. 2010. Seasonal plankton–fish interactions: light regime, prey phenology,

123 and herring foraging. *Ecology* 91:311–318.

124 Varpe, Ø., Ø. Fiksen, and A. Slotte. 2005. Meta-ecosystems and biological energy transport from

125 ocean to coast: the ecological importance of herring migration. *Oecologia* 146:443.
